# Supplementary material for: The Actinobacterial Colonization of Etruscan Paintings
Source: PubMed Central journal article supplement — Sci Rep. 2013 Mar 13;3:1440. doi: 10.1038/srep01440 (PMC3595702; doi:10.1038/srep01440), 2013-03-13
Supplement: srep01440-s1.pdf [file srep01440-s1.pdf]

## Supplementary Information

### The actinobacterial colonization of Etruscan paintings

M. Diaz-Herraiz, V. Jurado, S. Cuezva, L. Laiz, P. Pallecchi, P. Tiano, S. Sanchez-Moral, C. Saiz-Jimenez\*

\*To whom the correspondence should be addressed. E-mail: saiz@irnase.csic.es

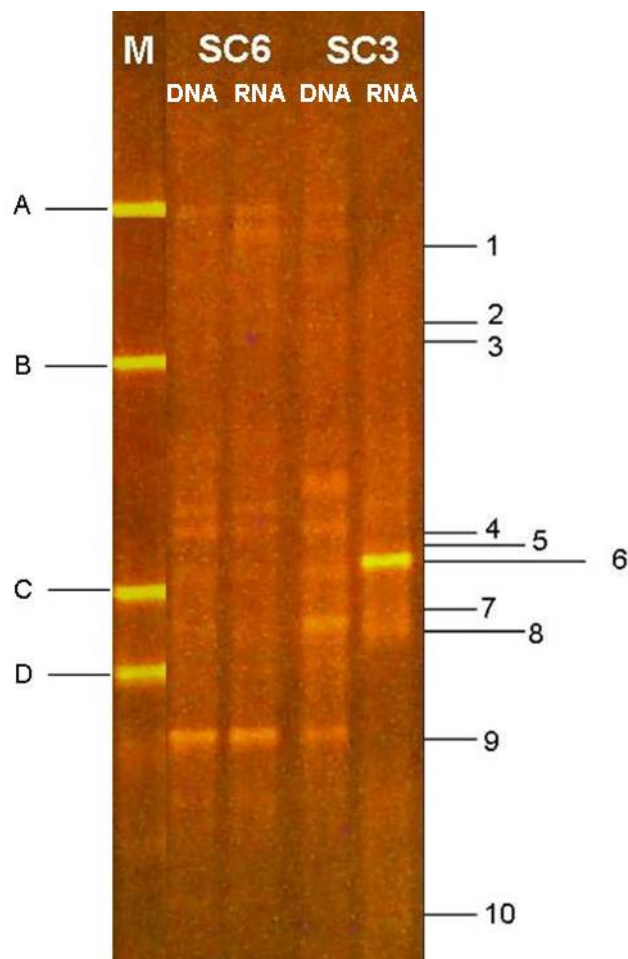

Figure S1. DGGE analysis of samples SC6 and SC3. The pattern of total bacteria (DNA) and metabolically active bacteria (RNA) are shown. Bands identification: 1: *Brevundimonas lenta*, 2: *Sphingomonas echinoides*, 3: *Nordella* sp., 4: *Steroidobacter denitrificans*, 5: *Nitrospira moscoviensis*, 6: *Nocardia ignorata*, 7: *Reyranella massiliensis*, 8: *Sporichthya polymorpha*, 9: *Pseudonocardia* sp., 10: *Rubrobacter* sp. Marker composition (M) is *Bacillus* sp. (A), *Paenibacillus* sp. (B), *Streptomyces* sp. (C), *Rhodococcus* sp. (D).

Table S1. Phylogenetic affiliations of the 16S rRNA sequences obtained from total bacteria in SC3 sample

| Representative clone  | No. of clones | Similarity (%) | Nearest published relative                                                           | Similarity (%) | Eztaxon affiliation (accession number)             |
|-----------------------|---------------|----------------|--------------------------------------------------------------------------------------|----------------|----------------------------------------------------|
| <b>Actinobacteria</b> |               |                |                                                                                      |                |                                                    |
| SC3-k5                | 1             | 85             | Uncultured bacterium from cave wall biofilm (HE602800)                               | 81             | <i>Streptoalloteichus tenebrarius</i> (AB184722)   |
| SC3-k23               | 1             | 89             | Uncultured bacterium from agricultural soil (EU449687)                               | 85             | <i>Fodinicola feengrottensis</i> (EF490376)        |
| SC3_k72               | 1             | 90             | Uncultured bacterium from cave wall biofilm (HE602902)                               | 88             | <i>Fodinicola feengrottensis</i> (EF490376)        |
| SC3_k61               | 1             | 90             | Uncultured bacterium from hydrocarbon contaminated soil (AM936195)                   | 88             | <i>Fodinicola feengrottensis</i> (EF490376)        |
| SC3_k53               | 1             | 87             | Uncultured bacterium natural shelter containing prehistoric paintings (EU434898)     | 84             | <i>Pseudonocardia alaniniphila</i> (EU722519)      |
| SC3_k37               | 1             | 89             | Uncultured bacterium meadow soil, basalt bedrock (HM480649)                          | 90             | <i>Pseudonocardia xinjiangensis</i> (AF325728)     |
| SC3_k50               | 1             | 90             | Uncultured bacterium from hydrocarbon contaminated soil (AM936195)                   | 88             | <i>Pseudonocardia mongoliensis</i> (AB521671)      |
| SC3_k63               | 1             | 91             | Uncultured bacterium from cave wall biofilm (HE602922)                               | 87             | <i>Pseudonocardia mongoliensis</i> (AB521671)      |
| SC3_k83               | 1             | 90             | Uncultured bacterium from undisturbed tall grass pairie (FJ479000)                   | 88             | <i>Pseudonocardia mongoliensis</i> (AB521671)      |
| SC3_k82               | 1             | 95             | Uncultured bacterium natural shelter containing prehistoric paintings (EU434898)     | 92             | <i>Pseudonocardia alaniniphila</i> (EU722519)      |
| SC3_k97               | 1             | 95             | Uncultured bacterium natural shelter containing prehistoric paintings (EU434898)     | 92             | <i>Pseudonocardia alaniniphila</i> (EU722519)      |
| SC3_k71               | 4             | 99             | Uncultured bacterium natural shelter containing prehistoric paintings (EU434898)     | 95             | <i>Pseudonocardia alaniniphila</i> (EU722519)      |
| SC3-k92               | 1             | 98             | Uncultured bacterium natural shelter containing prehistoric paintings (EU434898)     | 95             | <i>Pseudonocardia alaniniphila</i> (EU722519)      |
| SC3_k111              | 1             | 90             | Uncultured bacterium natural shelter containing prehistoric paintings (EU434898)     | 90             | <i>Jiangella alkaliphila</i> (AM422451)            |
| SC3_k80               | 1             | 96             | Uncultured bacterium natural shelter containing prehistoric paintings (EU434898)     | 93             | <i>Jiangella gansuensis</i> (AY631071)             |
| SC3_k28               | 1             | 95             | Uncultured bacterium natural shelter containing prehistoric paintings (EU434898)     | 95             | <i>Goodfellowiella coeruleoviolacea</i> (DQ093349) |
| SC3_k93               | 1             | 94             | Uncultured bacterium from cave environment with Paleolithic paintings (EF447078)     | 91             | <i>Pseudonocardia alaniniphila</i> (EU722519)      |
| SC3_k112              | 1             | 95             | Uncultured bacterium from cave environment with Paleolithic paintings (EF447078)     | 92             | <i>Pseudonocardia alaniniphila</i> (EU722519)      |
| SC3_k101              | 18            | 99             | Uncultured bacterium from cave environment with Paleolithic paintings (EF447078)     | 95             | <i>Pseudonocardia alaniniphila</i> (EU722519)      |
| SC3_k121              | 3             | 97             | Uncultured bacterium from cave environment with Paleolithic paintings (EF447078)     | 94             | <i>Pseudonocardia alaniniphila</i> (EU722519)      |
| SC3_k1                | 1             | 93             | Uncultured bacterium from forest soil (GQ203400)                                     | 89             | <i>Humicoccus flavidus</i> (DQ321750)              |
| SC3-k11               | 1             | 99             | Uncultured bacterium from dolomite rock in the central Alps (Switzerland) (AB257641) | 95             | <i>Pseudonocardia alaniniphila</i> (EU722519)      |
| <b>Bacteroidetes</b>  |               |                |                                                                                      |                |                                                    |
| SC3-k129              | 1             | 98             | Uncultured bacterium from tall grass prairie (FJ478511)                              | 93             | <i>Chryseolinea serpens</i> (FR774778)             |
| <b>Nitrospirae</b>    |               |                |                                                                                      |                |                                                    |
| SC3-k65               | 1             | 97             | Uncultured bacterium from cave wall biofilm (FJ535102)                               | 95             | <i>Nitrospira moscoviensis</i> (X82558)            |
| SC3-k96               | 1             | 96             | Uncultured bacterium from cave environment with Paleolithic paintings (EF447064)     | 93             | <i>Nitrospira moscoviensis</i> (X82558)            |
| SC3-k94               | 3             | 99             | Uncultured bacterium from cave environment with Paleolithic paintings (EF447064)     | 95             | <i>Nitrospira moscoviensis</i> (X82558)            |
| SC3-k31               | 1             | 90             | Uncultured bacterium from hydrocarbon-contaminated soil (AM936257)                   | 86             | <i>Nitrospira moscoviensis</i> (X82558)            |
| <b>Planctomycetes</b> |               |                |                                                                                      |                |                                                    |
| SC3-k60               | 1             | 92             | Uncultured bacterium from pasture soil (EF074323)                                    | 88             | <i>Gemmata obscuriglobus</i> (ABG001000325)        |
| SC3-k69               | 1             | 92             | Uncultured bacterium from pasture soil (EF074323)                                    | 89             | <i>Gemmata obscuriglobus</i> (ABG001000325)        |

| Representative clone          | No. of clones | Similarity (%) | Nearest published relative                                                         | Similarity (%) | Eztaxon affiliation (accession number)              |
|-------------------------------|---------------|----------------|------------------------------------------------------------------------------------|----------------|-----------------------------------------------------|
| SC3-k40                       | 1             | 91             | Uncultured bacterium from pasture soil (EF074323)                                  | 88             | <i>Gemmata obscuriglobus</i> (ABGO01000325)         |
| SC3-k13                       | 4             | 98             | Uncultured bacterium from pasture soil (EF074323)                                  | 93             | <i>Gemmata obscuriglobus</i> (ABGO01000325)         |
| SC3-k75                       | 1             | 86             | Uncultured bacterium from hydrocarbon-contaminated soil (AM935052)                 | 84             | <i>Pirellula staleyii</i> (CP001848)                |
| SC3-k32                       | 1             | 96             | Uncultured bacterium from hydrocarbon-contaminated soil (AM935052)                 | 91             | <i>Pirellula staleyii</i> (CP001848)                |
| SC3-k70                       | 1             | 97             | Uncultured bacterium from hydrocarbon-contaminated soil (AM935052)                 | 90             | <i>Pirellula staleyii</i> (CP001848)                |
| <b>Alphaproteobacteria</b>    |               |                |                                                                                    |                |                                                     |
| SC3-k38                       | 1             | 86             | Uncultured bacterium from trembling aspen rizosphere (EF018853)                    | 85             | <i>Ochrobactrum haematophilum</i> (AM422370)        |
| SC3_k84                       | 1             | 90             | Uncultured proteobacterium from hydrocarbon-contaminated soil (AM935332)           | 87             | <i>Bradyrhizobium oligotrophicum</i> (JQ619230)     |
| SC3_k7                        | 1             | 91             | <i>Inquilinus</i> sp. (DQ512800)                                                   | 90             | <i>Skermanella aerolata</i> (DQ672568)              |
| SC3_k14                       | 1             | 96             | Uncultured bacterium from biofilm attached on the membrane surfaces (GU257861)     | 95             | <i>Filomicrobium fusiforme</i> (Y14313)             |
| SC3_k115                      | 1             | 98             | <i>Nordella</i> sp. (AM411927)                                                     | 90             | <i>Methylocystis bryophila</i> (FN422003)           |
| <b>Betaproteobacteria</b>     |               |                |                                                                                    |                |                                                     |
| SC3-k29                       | 1             | 98             | Uncultured bacterium from cave environment with Paleolithic paintings (EF447071)   | 92             | <i>Sulfuritalea hydrogenivorans</i> (AB552842)      |
| <b>Gammaproteobacteria</b>    |               |                |                                                                                    |                |                                                     |
| SC3-k119                      | 1             | 97             | Uncultured bacterium from primary forest soil (EU881113)                           | 85             | <i>Panacagrimonas perspica</i> (AB257720)           |
| SC3-k49                       | 1             | 97             | Uncultured bacterium from polychlorinated-dioxin-dechlorinating process (AB663506) | 97             | <i>Panacagrimonas perspica</i> (AB257720)           |
| SC3-k36                       | 1             | 95             | Uncultured bacterium from cave wall biofilm (HE602880)                             | 94             | <i>Panacagrimonas perspica</i> (AB257720)           |
| SC3_k17                       | 1             | 93             | Uncultured bacterium from undisturbed tall grass prairie (FJ479326)                | 94             | <i>Steroidobacter denitrificans</i> (EF605262)      |
| SC3_k10                       | 5             | 99             | Uncultured bacterium from undisturbed tall grass prairie (FJ479326)                | 98             | <i>Steroidobacter denitrificans</i> (EF605262)      |
| SC3_k95                       | 1             | 87             | Uncultured bacterium from mixed grass prairie preserve (EU133167)                  | 85             | <i>Steroidobacter denitrificans</i> (EF605262)      |
| SC3_k103                      | 1             | 91             | Uncultured bacterium from mixed grass prairie preserve (EU133167)                  | 89             | <i>Steroidobacter denitrificans</i> (EF605262)      |
| SC3-k56                       | 1             | 99             | Uncultured bacterium from agricultural soil (FJ889290)                             | 98             | <i>Steroidobacter denitrificans</i> (EF605262)      |
| SC3_k59                       | 1             | 89             | Uncultured bacterium from cave wall biofilm (HE603166)                             | 85             | <i>Natronocella acetinitrillica</i> (EF103128)      |
| <b>Deltaproteobacteria</b>    |               |                |                                                                                    |                |                                                     |
| SC3-k35                       | 1             | 99             | Uncultured bacterium from hydrocarbon-contaminated soil (AM936257)                 | 85             | <i>Geoalkalibacter ferrihydriticus</i> (DQ309326)   |
| SC3_k120                      | 1             | 94             | Uncultured bacterium from hydrocarbon contaminated soil (AM936195)                 | 83             | <i>Desulfacinum infernum</i> (L27426)               |
| SC3-k27                       | 2             | 97             | Uncultured bacterium from hydrocarbon contaminated soil (AM936195)                 | 84             | <i>Pelobacter acetylenicus</i> (X70955)             |
| SC3-k100                      | 1             | 97             | Uncultured bacterium from hydrocarbon contaminated soil (AM936195)                 | 82             | <i>Desulfacinum infernum</i> (L274726)              |
| SC3_k30                       | 1             | 97             | Uncultured bacterium from hydrocarbon contaminated soil (AM936195)                 | 83             | <i>Pelobacter acetylenicus</i> (X70955)             |
| SC3_k76                       | 1             | 94             | Uncultured bacterium from hydrocarbon contaminated soil (AM936057)                 | 86             | <i>Desulfonatronum thiosulfatophilum</i> (FJ469578) |
| SC3-k122                      | 1             | 93             | Uncultured bacterium from hydrocarbon contaminated soil (AM936057)                 | 85             | <i>Desulfonatronum thiosulfatophilum</i> (FJ469578) |
| <b>Unclassified bacterium</b> |               |                |                                                                                    |                |                                                     |
| SC3-k19                       | 1             | 99             | Uncultured bacterium from black ferromanganese coatings (HE604306)                 | 82             | <i>Natranaerobius thermophilus</i> (CP001034)       |

Table S2. Phylogenetic affiliations of the 16S rRNA sequences obtained from metabolically active bacteria in SC3 sample

| Representative clone  | No. of clones | Similarity (%) | Nearest published relative                        | Similarity (%) | Eztaxon affiliation (accession number) |
|-----------------------|---------------|----------------|---------------------------------------------------|----------------|----------------------------------------|
| <b>Actinobacteria</b> |               |                |                                                   |                |                                        |
| SC3_Rk40              | 1             | 97             | Uncultured bacterium from water column (GQ340117) | 92             | <i>Nocardia ignorata</i> (AJ303008)    |
| SC3_Rk183             | 1             | 97             | Uncultured bacterium from water column (GQ340117) | 94             | <i>Nocardia ignorata</i> (AJ303008)    |
| SC3_Rk185             | 1             | 98             | Uncultured bacterium from water column (GQ340117) | 95             | <i>Nocardia ignorata</i> (AJ303008)    |
| SC3_Rk2               | 1             | 97             | Uncultured bacterium from water column (GQ340117) | 95             | <i>Nocardia ignorata</i> (AJ303008)    |
| SC3_Rk208             | 1             | 97             | Uncultured bacterium from water column(GQ340117)  | 96             | <i>Nocardia ignorata</i> (AJ303008)    |
| SC3_Rk162             | 1             | 98             | Uncultured bacterium from water column(GQ340117)  | 98             | <i>Nocardia ignorata</i> (AJ303008)    |
| SC3_Rk20              | 1             | 99             | Uncultured bacterium from water column (GQ340117) | 99             | <i>Nocardia ignorata</i> (AJ303008)    |
| SC3_Rk223             | 1             | 99             | Uncultured bacterium from water column (GQ340117) | 92             | <i>Nocardia ignorata</i> (AJ303008)    |
| SC3_Rk19              | 1             | 96             | <i>Nocardia</i> sp. (JF279914)                    | 87             | <i>Nocardia coubleae</i> (DQ235689)    |
| SC3_Rk186             | 1             | 99             | <i>Nocardia</i> sp. (JF279914)                    | 90             | <i>Nocardia ignorata</i> (AJ303008)    |
| SC3_Rk81              | 1             | 99             | <i>Nocardia</i> sp. (JF279914)                    | 90             | <i>Nocardia ignorata</i> (AJ303008)    |
| SC3_Rk156             | 1             | 99             | <i>Nocardia</i> sp. (JF279914)                    | 92             | <i>Nocardia soli</i> (AF430051)        |
| SC3_Rk173             | 1             | 96             | <i>Nocardia</i> sp. (JF279914.1)                  | 91             | <i>Nocardia ignorata</i> (AJ303008)    |
| SC3_Rk181             | 1             | 97             | <i>Nocardia</i> sp. (JF279914)                    | 93             | <i>Nocardia ignorata</i> (AJ303008)    |
| SC3_Rk116             | 1             | 99             | <i>Nocardia</i> sp. (JF279914)                    | 92             | <i>Nocardia ignorata</i> (AJ303008)    |
| SC3_Rk197             | 1             | 99             | <i>Nocardia</i> sp. (JF279914)                    | 92             | <i>Nocardia ignorata</i> (AJ303008)    |
| SC3_Rk216             | 1             | 98             | <i>Nocardia</i> sp. (JF279914)                    | 92             | <i>Nocardia ignorata</i> (AJ303008)    |
| SC3_Rk184             | 1             | 97             | <i>Nocardia</i> sp. (JF279914)                    | 91             | <i>Nocardia fluminea</i> (AF277204)    |
| SC3_Rk228             | 1             | 99             | <i>Nocardia</i> sp. (JF279914.1)                  | 93             | <i>Nocardia ignorata</i> (AJ303008)    |
| SC3_Rk203             | 1             | 98             | <i>Nocardia</i> sp.(JF279914.1)                   | 94             | <i>Nocardia ignorata</i> (AJ303008)    |
| SC3_Rk190             | 1             | 99             | <i>Nocardia</i> sp. (JF279914.1)                  | 93             | <i>Nocardia ignorata</i> (AJ303008)    |
| SC3_Rk187             | 1             | 99             | <i>Nocardia</i> sp. (JF279914.1)                  | 94             | <i>Nocardia ignorata</i> (AJ303008)    |
| SC3_Rk206             | 1             | 98             | <i>Nocardia</i> sp. (JF279914.1)                  | 94             | <i>Nocardia ignorata</i> (AJ303008)    |
| SC3_Rk125             | 1             | 98             | <i>Nocardia</i> sp. (JF279914.1)                  | 95             | <i>Nocardia ignorata</i> (AJ303008)    |
| SC3_Rk8               | 1             | 98             | <i>Nocardia coubleae</i> (DQ235689)               | 94             | <i>Nocardia coubleae</i> (DQ235689)    |
| SC3_Rk222             | 1             | 97             | <i>Nocardia coubleae</i> (DQ235689)               | 98             | <i>Nocardia ignorata</i> (AJ303008)    |
| SC3_Rk124             | 63            | 98             | <i>Nocardia coubleae</i> (DQ235689)               | 99             | <i>Nocardia ignorata</i> (AJ303008)    |
| SC3_Rk158             | 1             | 97             | <i>Nocardia coubleae</i> (DQ235689)               | 97             | <i>Nocardia ignorata</i> (AJ303008)    |
| SC3_Rk202             | 1             | 99             | <i>Nocardia</i> sp. (JF279914)                    | 94             | <i>Nocardia fluminea</i> (AF277204)    |
| SC3_Rk200             | 1             | 99             | <i>Nocardia</i> sp. (JF279914)                    | 93             | <i>Nocardia ignorata</i> (AJ303008)    |
| SC3_Rk180             | 1             | 99             | <i>Nocardia</i> sp. (JF279914)                    | 93             | <i>Nocardia ignorata</i> (AJ303008)    |
| SC3_Rk44              | 2             | 99             | <i>Nocardia fluminea</i> (AF430053)               | 99             | <i>Nocardia fluminea</i> (AF277204)    |

| Representative clone       | No. of clones | Similarity (%) | Nearest published relative                                         | Similarity (%) | Eztaxon affiliation (accession number)         |
|----------------------------|---------------|----------------|--------------------------------------------------------------------|----------------|------------------------------------------------|
| SC3_Rk192                  | 1             | 99             | <i>Nocardia fluminea</i> (AF430053)                                | 97             | <i>Nocardia fluminea</i> (AF277204)            |
| SC3_Rk43                   | 1             | 99             | <i>Nocardia fluminea</i> (AF430053)                                | 99             | <i>Nocardia fluminea</i> (AF277204)            |
| <b>Deltaproteobacteria</b> |               |                |                                                                    |                |                                                |
| SC3_Rk10                   | 1             | 95             | Uncultured bacterium from hydrocarbon-contaminated soil (AM935112) | 79             | <i>Desulfosalsimonas propionica</i> (DQ067422) |

Table S3. Phylogenetic affiliations of the 16S rRNA sequences obtained from total bacteria in SC6 sample

| Representative clone  | No. of clones | Similarity (%) | Nearest published relative                                                       | Similarity (%) | Eztaxon affiliation (accession number)                                                               |
|-----------------------|---------------|----------------|----------------------------------------------------------------------------------|----------------|------------------------------------------------------------------------------------------------------|
| <b>Acidobacteria</b>  |               |                |                                                                                  |                |                                                                                                      |
| SC6_k110              | 1             | 97             | Uncultured bacterium from agricultural soil (EU440603)                           | 81             | <i>Geothrix fermentans</i> (U41563)<br>Candidatus <i>Chloracidobacterium thermophilum</i> (CP002514) |
| SC6_k77               | 2             | 99             | Uncultured bacterium from farm soil (AY922046)                                   | 86             | (CP002514)                                                                                           |
| SC6_k4                | 1             | 99             | Uncultured bacterium from hydrocarbon-contaminated soil (FM209164)               | 89             | <i>Solibacter usitatus</i> (CP000473)                                                                |
| <b>Actinobacteria</b> |               |                |                                                                                  |                |                                                                                                      |
| SC6_k75               | 41            | 98             | Uncultured bacterium from shelter containing prehistoric paintings (EU434898)    | 95             | <i>Pseudonocardia saturnea</i> (AJ252829)                                                            |
| SC6_k140              | 1             | 95             | Uncultured bacterium from salmonid gill bacteria (AY494649)                      | 93             | <i>Pseudonocardia saturnea</i> (AJ252829)                                                            |
| SC6_k84               | 1             | 97             | Uncultured bacterium Altamira Cave, Spain (EF188338)                             | 95             | <i>Pseudonocardia alaniniphila</i> (EU722519)                                                        |
| SC6_k89               | 1             | 90             | Uncultured bacterium from fragment of historical paper (FN689575)                | 91             | <i>Rubrobacter xylanophilus</i> (CP000386)                                                           |
| SC6_k56               | 1             | 97             | Pseudonocardiaceae bacterium (JX067732)                                          | 99             | <i>Lentzea albida</i> (AB006176)                                                                     |
| SC6_k14               | 1             | 95             | Uncultured bacterium from mineral soils (JX098374)                               | 98             | <i>Pseudonocardia saturnea</i> (AJ252829)                                                            |
| SC6_k43               | 1             | 94             | Uncultured bacterium from Altamira Cave, Spain (EF188338)                        | 92             | <i>Pseudonocardia artemisiae</i> (GU227146)                                                          |
| SC6_k72               | 1             | 96             | Uncultured bacterium from Atacama desert soil (GU552192)                         | 91             | <i>Pseudonocardia saturnea</i> (AJ252829)                                                            |
| SC6_k54               | 1             | 96             | Uncultured bacterium from karstic cave (FJ535083)                                | 93             | <i>Pseudonocardia saturnea</i> (AJ252829)                                                            |
| SC6_k138              | 1             | 97             | Uncultured bacterium from tallgrass prairie restoration (EU299989)               | 92             | <i>Pseudonocardia petroleophila</i> (X80596)                                                         |
| SC6_k47               | 1             | 94             | Uncultured bacterium from karstic cave (FJ535083)                                | 91             | <i>Pseudonocardia alaniniphila</i> (EU722519)                                                        |
| SC6_k78               | 1             | 97             | Uncultured bacterium from karstic cave (FJ535083)                                | 93             | <i>Jiangella gansuensis</i> (AY631071)                                                               |
| SC6_k106              | 11            | 99             | Uncultured bacterium from karstic cave (FJ535083)                                | 95             | <i>Pseudonocardia saturnea</i> (AJ252829)                                                            |
| SC6_k135              | 2             | 98             | Uncultured bacterium from cave environment with Paleolithic paintings (EF447073) | 94             | <i>Pseudonocardia alaniniphila</i> (EU722519)                                                        |
| SC6_k117              | 1             | 99             | Uncultured bacterium from cave wall biofilm (HE602855)                           | 95             | <i>Pseudonocardia saturnea</i> (AJ252829)                                                            |
| SC6_k127              | 1             | 98             | Uncultured bacterium partial cave wall biofilm (HE602855)                        | 94             | <i>Pseudonocardia petroleophila</i> (X80596)                                                         |
| SC6_k122              | 1             | 97             | Uncultured bacterium partial cave wall biofilm (HE602855)                        | 94             | <i>Pseudonocardia saturnea</i> (AJ252829)                                                            |
| SC6_k131              | 1             | 97             | Uncultured bacterium partial cave wall biofilm (HE602855)                        | 94             | <i>Pseudonocardia petroleophila</i> (X80596)                                                         |
| SC6_k98               | 1             | 95             | <i>Nocardioides kribbensis</i> (AY835926)                                        | 95             | <i>Nocardioides salarius</i> (DQ401092)                                                              |
| SC6_k40               | 1             | 96             | <i>Rubrobacter bracarensis</i> (HE672088)                                        | 97             | <i>Rubrobacter bracarensis</i> (EU512991)                                                            |

| Representative clone       | No. of clones | Similarity (%) | Nearest published relative                                                             | Similarity (%) | Eztaxon affiliation (accession number)              |
|----------------------------|---------------|----------------|----------------------------------------------------------------------------------------|----------------|-----------------------------------------------------|
| SC6_k115                   | 1             | 99             | <i>Rubrobacter xylanophilus</i> (X87135)                                               | 99             | <i>Rubrobacter xylanophilus</i> (CP000386)          |
| <b>Bacteroidetes</b>       |               |                |                                                                                        |                |                                                     |
| SC6_k23                    | 1             | 97             | Uncultured Bacteroidetes bacterium from dry modern freshwater stromatolites (EU753657) | 94             | <i>Chryseanema serpens</i> (FR774778)               |
| <b>Nitrospirae</b>         |               |                |                                                                                        |                |                                                     |
| SC6_k44                    | 1             | 97             | Uncultured bacterium from caves with Paleolithic paintings (EF447064)                  | 94             | <i>Nitrospira moscoviensis</i> (X82558)             |
| SC6_k45                    | 3             | 99             | Uncultured bacterium from caves with Paleolithic paintings (EF447064)                  | 96             | <i>Nitrospira moscoviensis</i> (X82558)             |
| SC6_k108                   | 1             | 99             | Uncultured bacterium from grassland (EF663924)                                         | 96             | <i>Nitrospira moscoviensis</i> (X82558)             |
| <b>Planctomycetes</b>      |               |                |                                                                                        |                |                                                     |
| SC6_k58                    | 2             | 96             | Uncultured bacterium from hydrocarbon-contaminated soil (AM935052)                     | 91             | <i>Pirellula staleyi</i> (CP001848)                 |
| SC6_k118                   | 1             | 96             | Uncultured bacterium from aliphatic hydrocarbon-contaminated soil (AM935203)           | 89             | <i>Pirellula staleyi</i> (CP001848)                 |
| SC6_k103                   | 1             | 99             | Uncultured bacterium from soil (EF074323)                                              | 93             | <i>Gemmata obscuriglobus</i> (ABGO01000325)         |
| <b>Alphaproteobacteria</b> |               |                |                                                                                        |                |                                                     |
| SC6_k133                   | 1             | 97             | Uncultured bacterium from soil (JF703577)                                              | 88             | <i>Aquamicrobium aerolatum</i> (FM210786)           |
| SC6_k26                    | 1             | 99             | Uncultured bacterium from environmental samples (AY921937)                             | 99             | <i>Reyranelia massiliensis</i> (EF394922)           |
| SC6_k141                   | 1             | 91             | Uncultured bacterium from trembling aspen (EF018935)                                   | 90             | <i>Dongia mobilis</i> (FJ455532)                    |
| SC6_k151                   | 1             | 98             | Uncultured bacterium from contaminated soil (AM934842)                                 | 92             | <i>Dongia mobilis</i> (FJ455532)                    |
| SC6_k128                   | 1             | 99             | Uncultured bacterium from soil (JF703546)                                              | 93             | <i>Dongia mobilis</i> (FJ455532)                    |
| SC6_k129                   | 1             | 99             | <i>Nordella</i> sp. (AM411927)                                                         | 91             | <i>Methylovirgula ligni</i> (FM252034)              |
| <b>Betaproteobacteria</b>  |               |                |                                                                                        |                |                                                     |
| SC6_k50                    | 1             | 98             | Uncultured bacterium from soil (JF703443)                                              | 91             | <i>Denitratisona oestradiolicum</i> (AY879297)      |
| SC6_k46                    | 1             | 98             | Uncultured bacterium from tailing site (EF612410)                                      | 90             | <i>Cupriavidus gilardii</i> (EU024163)              |
| <b>Gammaproteobacteria</b> |               |                |                                                                                        |                |                                                     |
| SC6_k99                    | 1             | 97             | Uncultured bacterium from aliphatic hydrocarbon-contaminated soil (AM936521)           | 88             | <i>Steroidobacter denitrificans</i> (EF605262)      |
| SC6_k55                    | 1             | 99             | Uncultured bacterium from farm soil (AY922146)                                         | 98             | <i>Steroidobacter denitrificans</i> (EF605262)      |
| SC6_k62                    | 1             | 99             | Uncultured bacterium from farm soil (AY922146)                                         | 98             | <i>Steroidobacter denitrificans</i> (EF605262)      |
| SC6_k123                   | 1             | 98             | Uncultured bacterium from soil (EU134744)                                              | 88             | <i>Solimonas aquatica</i> (EU303271)                |
| SC6_k13                    | 1             | 97             | Uncultured bacterium soil (JF703422)                                                   | 90             | <i>Panacagrimonas perspica</i> (AB257720)           |
| SC6_k105                   | 1             | 97             | Gamma bacterium from polychlorinated-dioxin-dechlorinating process (AB663506)          | 96             | <i>Panacagrimonas perspica</i> (AB257720)           |
| SC6_k86                    | 1             | 97             | <i>Panacagrimonas perspica</i> (AB257720)                                              | 97             | <i>Panacagrimonas perspica</i> (AB257720)           |
| <b>Deltaproteobacteria</b> |               |                |                                                                                        |                |                                                     |
| SC6_k79                    | 1             | 99             | Uncultured bacterium from Altamira Cave, Spain (HE604306)                              | 82             | <i>Desulfonatronum thiosulfatophilum</i> (FJ469578) |
| SC6_k83                    | 1             | 98             | Uncultured bacterium from karstic cave (FJ535064)                                      | 85             | <i>Desulfosalsimonas propionica</i> (DQ067422)      |
| SC6_k11                    | 1             | 97             | Uncultured bacterium from farm soil (AY921675)                                         | 90             | <i>Haliangium tepidum</i> (AB062751)                |
| SC6_k145                   | 1             | 94             | Uncultured bacterium from deep-sea hydrothermal field (AB197167)                       | 83             | <i>Desulfobalobium utahense</i> (DQ067451)          |
| SC6_k82                    | 1             | 96             | Uncultured bacterium from geological formations (HM187083)                             | 84             | <i>Geopsychrobacter electrodiphilus</i> (AY187303)  |

| Representative clone | No. of clones | Similarity (%) | Nearest published relative                                         | Similarity (%) | Eztaxon affiliation (accession number)            |
|----------------------|---------------|----------------|--------------------------------------------------------------------|----------------|---------------------------------------------------|
| SC6_k22              | 1             | 97             | Uncultured bacterium from hydrocarbon-contaminated soil (AM936057) | 87             | <i>Geoalkalibacter ferrihydriticus</i> (DQ309326) |
| SC6_k27              | 1             | 99             | Uncultured bacterium from soil (JF703548)                          | 87             | <i>Geoalkalibacter ferrihydriticus</i> (DQ309326) |
| SC6_k144             | 1             | 96             | Uncultured bacterium from soil (JF703548)                          | 84             | <i>Geoalkalibacter ferrihydriticus</i> (DQ309326) |

Table S4. Phylogenetic affiliations of the 16S rRNA sequences obtained from metabolically active bacteria in SC6 sample

| Representative clone  | No. of clones | Similarity (%) | Nearest published relative                                           | Similarity (%) | Eztaxon affiliation (accession number)                        |
|-----------------------|---------------|----------------|----------------------------------------------------------------------|----------------|---------------------------------------------------------------|
| <b>Acidobacteria</b>  |               |                |                                                                      |                |                                                               |
| SC6_Rk107             | 3             | 98             | Uncultured bacterium from farm soil (AY922046)                       | 85             | Candidatus <i>Chloracidobacterium thermophilum</i> (CP002514) |
| SC6_Rk90              | 3             | 97             | Uncultured bacterium from farm soil (AY922046)                       | 84             | Candidatus <i>Chloracidobacterium thermophilum</i> (CP002514) |
| SC6_Rk77              | 2             | 98             | Uncultured bacterium from cave with Paleolithic paintings (EF447080) | 84             | Candidatus <i>Chloracidobacterium thermophilum</i> (CP002514) |
| SC6_Rk81              | 1             | 98             | Uncultured bacterium from farm soil (AY922046)                       | 87             | Candidatus <i>Chloracidobacterium thermophilum</i> (CP002514) |
| SC6_Rk146             | 1             | 98             | Uncultured bacterium from hydrocarbon-contaminated soil (AM935516)   | 84             | Candidatus <i>Chloracidobacterium thermophilum</i> (CP002514) |
| <b>Actinobacteria</b> |               |                |                                                                      |                |                                                               |
| SC6_Rk56              | 1             | 94             | Uncultured bacterium from fragment of historical paper (FN689575)    | 95             | <i>Rubrobacter xylanophilus</i> (CP000386)                    |
| SC6_Rk124             | 1             | 99             | Uncultured bacterium from fragment of historical paper (FN689575)    | 99             | <i>Rubrobacter xylanophilus</i> (CP000386)                    |
| SC6_Rk43              | 1             | 96             | Uncultured bacterium from dolomite rock (AB257641)                   | 93             | <i>Humicoccus flavidus</i> (DQ321750)                         |
| SC6_Rk131             | 1             | 99             | Uncultured bacterium from cave with Paleolithic paintings (EF447078) | 94             | <i>Pseudonocardia yuanmoensis</i> (JN656709)                  |
| SC6_Rk28              | 1             | 98             | Uncultured bacterium from cave with Paleolithic paintings (EF447079) | 94             | <i>Pseudonocardia alaniniphila</i> (EU722519)                 |
| SC6_Rk48              | 1             | 98             | Uncultured bacterium from cave with Paleolithic paintings (EF447079) | 94             | <i>Pseudonocardia alaniniphila</i> (EU722519)                 |
| SC6_Rk112             | 20            | 99             | Uncultured bacterium from karstic cave (FJ535083)                    | 95             | <i>Pseudonocardia saturnea</i> (AJ252829)                     |
| SC6_Rk12              | 19            | 99             | Uncultured bacterium from cave wall biofilm (HE602855)               | 94             | <i>Pseudonocardia saturnea</i> (AJ252829)                     |
| SC6_Rk26              | 2             | 98             | <i>Rubrobacter xylanophilus</i> (X87135)                             | 99             | <i>Rubrobacter xylanophilus</i> (CP000386)                    |
| SC6_Rk152             | 2             | 97             | <i>Sporichthya polymorpha</i> (NR_024727)                            | 97             | <i>Sporichthya polymorpha</i> (AB025317)                      |
| SC6_Rk36              | 1             | 96             | <i>Actinophytocola oryzae</i> (EU420070)                             | 96             | <i>Actinophytocola oryzae</i> (EU420070)                      |
| <b>Bacteroidetes</b>  |               |                |                                                                      |                |                                                               |
| SC6_Rk80              | 1             | 96             | Uncultured bacterium from soil (JF703369)                            | 92             | <i>Ohtaekwangia kribbensis</i> (GU117703)                     |
| SC6_Rk88              | 1             | 95             | Uncultured bacterium from soil (JF703369)                            | 91             | <i>Ohtaekwangia kribbensis</i> (GU117703)                     |
| <b>Chloroflexi</b>    |               |                |                                                                      |                |                                                               |
| SC6_Rk18              | 1             | 84             | Uncultured bacterium from sludge (CU921102)                          | 77             | <i>Anaerolinea thermolimos</i> (AB109437)                     |

| Representative clone       | No. of clones | Similarity (%) | Nearest published relative                                                      | Similarity (%) | Eztaxon affiliation (accession number)         |
|----------------------------|---------------|----------------|---------------------------------------------------------------------------------|----------------|------------------------------------------------|
| <b>Firmicutes</b>          |               |                |                                                                                 |                |                                                |
| SC6_Rk106                  | 1             | 99             | Uncultured bacterium from bacterial biota in psoriatic lesions (EF419345)       | 95             | <i>Anaerococcus octavius</i> (Y07841)          |
| SC6_Rk64                   | 1             | 98             | <i>Bacillus ginsengi</i> (NR_044193)                                            | 99             | <i>Bhargavaea ginsengi</i> (EF371375)          |
| SC6_Rk52                   | 1             | 97             | Uncultured bacterium from ileum associated microbial composition (HQ753409)     | 89             | <i>Bacillus decolorationis</i> (AJ315075)      |
| <b>Nitrospirae</b>         |               |                |                                                                                 |                |                                                |
| SC6_Rk7                    | 1             | 99             | Uncultured bacterium from cave with Paleolithic paintings (EF447064)            | 88             | <i>Nitrospira moscoviensis</i> (X82558)        |
| SC6_Rk8                    | 2             | 99             | Uncultured bacterium from soil (EF074926)                                       | 95             | <i>Nitrospira moscoviensis</i> (X82558)        |
| <b>Planctomycetes</b>      |               |                |                                                                                 |                |                                                |
| SC6_Rk99                   | 1             | 97             | Uncultured bacterium from cave wall biofilm (DQ499305)                          | 82             | <i>Pirellula staleyi</i> (CP001848)            |
| <b>Alphaproteobacteria</b> |               |                |                                                                                 |                |                                                |
| SC6_Rk49                   | 1             | 99             | Uncultured bacterium from fluid low-temperature petroleum reservoirs (GU179690) | 99             | <i>Sphingomonas echinoides</i> (AJ012461)      |
| SC6_Rk69                   | 1             | 99             | Uncultured bacterium from extreme deep-ocean environment (HM799067)             | 99             | <i>Brevundimonas lenta</i> (EF363713)          |
| SC6_Rk31                   | 1             | 99             | Uncultured bacterium from drinking water (JQ906083)                             | 92             | <i>Bosea thiooxidans</i> (AJ250796)            |
| SC6_Rk82                   | 1             | 99             | Uncultured proteobacterium from Antarctic terrestrial habitats (EF2198781)      | 97             | <i>Afipia broomeae</i> (U87759)                |
| SC6_Rk13                   | 1             | 99             | Uncultured bacterium from septic tank effluent and a soil biomat (EU404023)     | 96             | <i>Afipia birgiae</i> (AF288304)               |
| SC6_Rk151                  | 1             | 99             | Uncultured bacterium from tallgrass prairie restoration (EU299387)              | 95             | <i>Pseudolabrys taiwanensis</i> (DQ062742)     |
| SC6_Rk108                  | 1             | 98             | Uncultured bacterium from hydrocarbon-contaminated soil (AM936021)              | 90             | <i>Fodinicurvata fenggangensis</i> (FJ357427)  |
| SC6_Rk165                  | 1             | 98             | Uncultured bacterium from aliphatic hydrocarbon-contaminated soil (AM934842)    | 91             | <i>Dongia mobilis</i> (FJ455532)               |
| SC6_Rk175                  | 1             | 96             | Uncultured bacterium from Altamira Cave (HE603164)                              | 88             | <i>Skermanella xinjiangensis</i> (EU586202)    |
| SC6_Rk127                  | 1             | 95             | Uncultured bacterium from ornamental fish aquarium water (JX317568)             | 87             | <i>Hyphomicrobium sulfonivorans</i> (AF235089) |
| SC6_Rk55                   | 1             | 98             | Uncultured bacterium from microbial fuel cells (JN540116)                       | 93             | <i>Dongia mobilis</i> (FJ455532)               |
| SC6_Rk132                  | 1             | 99             | Uncultured bacterium from farm soil (AY921937)                                  | 98             | <i>Reyranella massiliensis</i> (EF394922)      |
| SC6_Rk22                   | 1             | 97             | Uncultured bacterium from soil (JF703577)                                       | 88             | <i>Hyphomicrobium sulfonivorans</i> (AF235089) |
| SC6_Rk2                    | 1             | 99             | Uncultured bacterium from soil (AY921937)                                       | 98             | <i>Reyranella massiliensis</i> (EF394922)      |
| SC6_Rk145                  | 1             | 99             | Uncultured bacterium from soil (AY921937)                                       | 98             | <i>Reyranella massiliensis</i> (EF394922)      |
| SC6_Rk160                  | 1             | 99             | Uncultured bacterium from hydrocarbon-contaminated soil (AM936247)              | 97             | <i>Reyranella massiliensis</i> (EF394922)      |
| SC6_Rk63                   | 1             | 99             | Uncultured bacterium from soil (JF703546)                                       | 94             | <i>Dongia mobilis</i> (FJ455532)               |
| SC6_Rk94                   | 1             | 99             | <i>Methylobacterium zatmanii</i> (AB698689)                                     | 99             | <i>Methylobacterium zatmanii</i> (AB175647)    |
| SC6_Rk65                   | 1             | 97             | <i>Novosphingobium subterraneum</i> (NR_040827)                                 | 99             | <i>Novosphingobium subterraneum</i> (AB025014) |
| SC6_Rk75                   | 1             | 98             | <i>Sphingomonas</i> sp. (EU337119)                                              | 98             | <i>Sphingomonas asaccharolytica</i> (Y09639)   |
| SC6_Rk172                  | 1             | 99             | <i>Sphingomonas kaistensis</i> (NR_043171)                                      | 98             | <i>Sphingomonas kaistensis</i> (AY769083)      |
| SC6_Rk149                  | 1             | 99             | <i>Nordella</i> sp. (AM411927)                                                  | 91             | <i>Methylocystis bryophila</i> (FN422003)      |
| <b>Betaproteobacteria</b>  |               |                |                                                                                 |                |                                                |
| SC6_Rk130                  | 1             | 98             | Uncultured bacterium from soil (FJ444753)                                       | 91             | <i>Cupriavidus gilardii</i> (EU024163)         |
| SC6_Rk150                  | 1             | 97             | Uncultured bacterium from semiarid lead-zinc mine tailing site (EF612412)       | 90             | <i>Cupriavidus gilardii</i> (EU024163)         |



| Representative clone       | No. of clones | Similarity (%) | Nearest published relative                                                         | Similarity (%) | Eztaxon affiliation (accession number)            |
|----------------------------|---------------|----------------|------------------------------------------------------------------------------------|----------------|---------------------------------------------------|
| <b>Gammaproteobacteria</b> |               |                |                                                                                    |                |                                                   |
| SC6_Rk115                  | 2             | 88             | Uncultured bacterium from alkaline lake (JN825495)                                 | 88             | <i>Solimonas thermophila</i> (JN415769)           |
| SC6_Rk50                   | 2             | 99             | Uncultured bacterium from farm soil (AY922146)                                     | 98             | <i>Steroidobacter denitrificans</i> (EF605262)    |
| SC6_Rk66                   | 1             | 99             | Uncultured bacterium hydrocarbon-contaminated soil (AM935773)                      | 98             | <i>Steroidobacter denitrificans</i> (EF605262)    |
| SC6_Rk37                   | 2             | 99             | Uncultured bacterium from agricultural soil (FJ889292)                             | 97             | <i>Steroidobacter denitrificans</i> (EF605262)    |
| SC6_Rk70                   | 1             | 97             | Uncultured bacterium from soil (JF703422)                                          | 90             | <i>Panacagrimonas perspica</i> (AB257720)         |
| SC6_Rk11                   | 1             | 95             | Uncultured bacterium from soil (JF703422)                                          | 88             | <i>Panacagrimonas perspica</i> (AB257720)         |
| SC6_Rk32                   | 1             | 96             | Uncultured bacterium from polychlorinated-dioxin-dechlorinating process (AB663506) | 96             | <i>Panacagrimonas perspica</i> (AB257720)         |
| SC6_Rk23                   | 2             | 96             | <i>Panacagrimonas perspica</i> (AB257720)                                          | 96             | <i>Panacagrimonas perspica</i> (AB257720)         |
| SC6_Rk103                  | 6             | 97             | <i>Panacagrimonas perspica</i> (AB257720)                                          | 97             | <i>Panacagrimonas perspica</i> (AB257720)         |
| SC6_Rk15                   | 1             | 97             | <i>Panacagrimonas perspica</i> (AB257720)                                          | 97             | <i>Panacagrimonas perspica</i> (AB257720)         |
| <b>Deltaproteobacteria</b> |               |                |                                                                                    |                |                                                   |
| SC6_Rk14                   | 1             | 92             | Uncultured bacterium from sponge-associated bacteria (JN596706)                    | 80             | <i>Desulfuromonas palmitatis</i> (U28172)         |
| SC6_Rk10                   | 1             | 97             | Uncultured bacterium from tallgrass prairie soil (EU131926)                        | 83             | <i>Deferrisoma camini</i> (JF802205)              |
| SC6_Rk104                  | 1             | 95             | Uncultured bacterium from aliphatic hydrocarbon-contaminated soil (AM936057)       | 86             | <i>Geoalkalibacter ferrihydriticus</i> (DQ309326) |
| SC6_Rk16                   | 1             | 96             | Uncultured bacteria bacterium from anaerobic digestion of sludge (CU923178)        | 85             | <i>Pelobacter acetylenicus</i> (X70955)           |
| <b>Verrucomicrobia</b>     |               |                |                                                                                    |                |                                                   |
| SC6_Rk19                   | 1             | 99             | Uncultured bacterium from soil biosphere (EU135440)                                | 92             | <i>Pedosphaera parvula</i> (ABOX01000003)         |

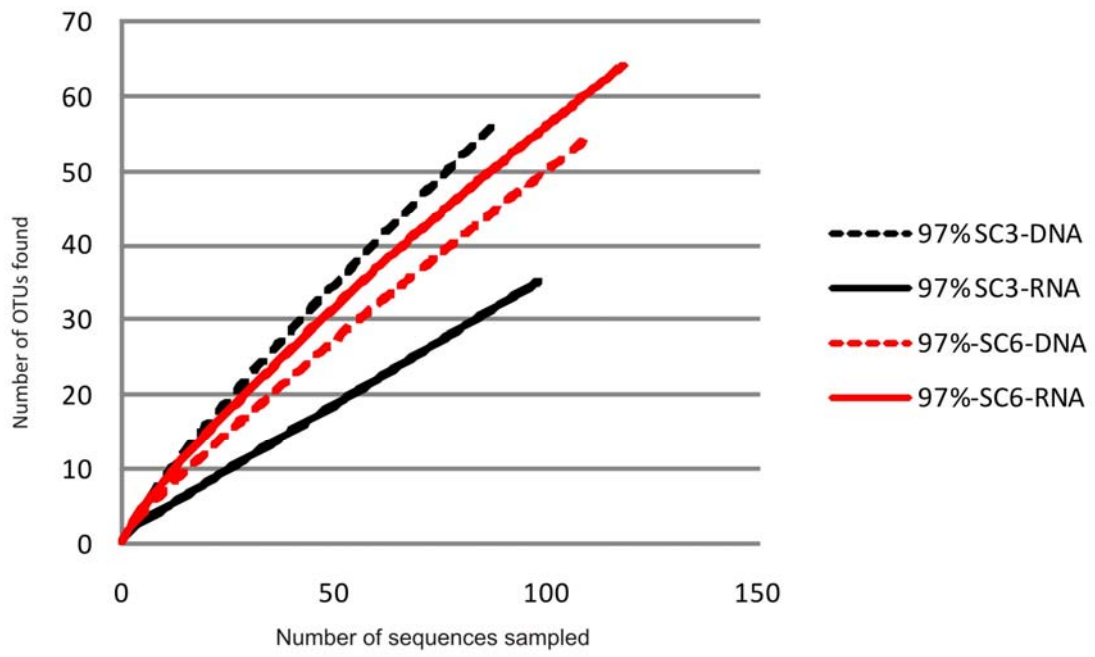

Figure S2. Rarefaction curves of samples SC3 and SC6.
